# Supplementary material for: Developing environmentally relevant micro- and nanoplastics to assess removal efficiencies in wastewater treatment processes
Source: Royal Society of Chemistry journal article supplement (doi:10.1039/d4en00250d), 2024-10-29
Supplement: d4en00250d1.pdf [file d4en00250d1.pdf]

# Developing environmentally relevant micro- and nanoplastics to assess removal efficiencies in wastewater treatment processes

Martín Benzo<sup>a</sup>, María Eugenia Pérez-Barthaburu<sup>a</sup>, Andrés Pérez-Parada<sup>a</sup>, Álvaro Olivera<sup>a</sup> and  
Laura Fornaro<sup>a</sup>.

<sup>a</sup>Grupo de Desarrollo de Materiales y Estudios Ambientales, Departamento de Desarrollo Tecnológico – Centro  
Universitario Regional del Este – Universidad de la República – Ruta 9 y Ruta 15 – Rocha, Uruguay  
martin.benzo@cure.edu.uy

## ELECTRONIC SUPPLEMENTARY INFORMATION

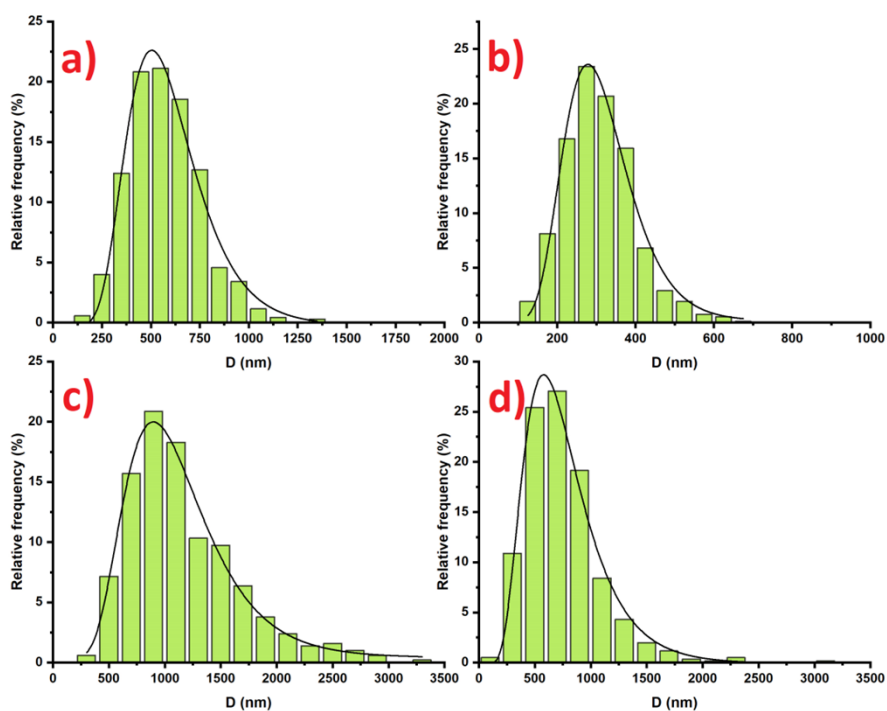

Figure SM1 – Particle size distributions for experiments PE1 (a), PE2 (b), PE3 (c) and PE4 (d)

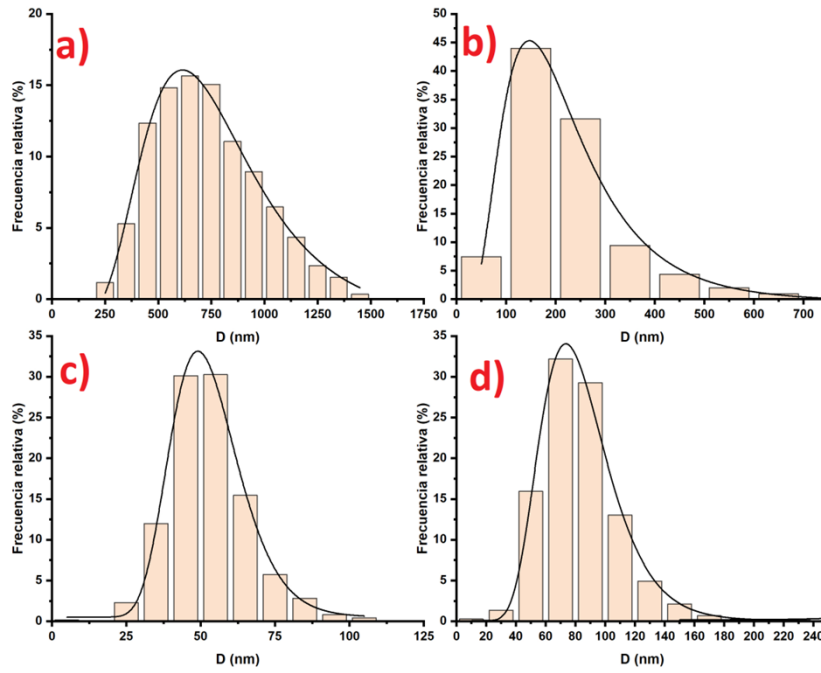

Figure SM2 – Particle size distributions for experiments PP1 (a), PS1 (b), PVC1 (c) and PET1 (d)

|                    | Medium                         | Initial turbidity (NTU) | Final turbidity (NTU) | Initial pH  | Final pH    | $\eta_R$ (%)            |
|--------------------|--------------------------------|-------------------------|-----------------------|-------------|-------------|-------------------------|
| <b>Non-aged PE</b> | FWW                            | 62.2 (3.9)              | 2.89 (0.70)           | 8.23 (0.08) | 7.11 (0.03) | 95.4 <sup>a</sup> (1.1) |
|                    | DW                             | 9.0 (2.3)               | -                     | 6.10 (0.05) | -           | -                       |
|                    | Peptone 10g/L – 120 mg/L alum  | 54.45 (0.95)            | 51.3 (1.1)            | 7.60 (0.14) | 7.16 (0.04) | 5.8 <sup>b</sup> (1.3)  |
|                    | Peptone 10 g/L – 360 mg/L alum | 54.45 (0.95)            | 10.4 (1.0)            | 7.60 (0.14) | 5.13 (0.07) | 80.9 <sup>c</sup> (1.5) |
|                    | Peptone 10g/L + NaCl 0.1 M     | 53.8 (1.3)              | 25.3 (2.6)            | 7.47 (0.05) | 7.22 (0.02) | 52.9 <sup>d</sup> (3.7) |
| <b>Aged PE</b>     | FWW                            | 60.5 (2.3)              | 2.60 (0.70)           | 8.18 (0.12) | 7.11 (0.03) | 95.7 <sup>a</sup> (1.1) |
|                    | DW                             | 53.9 (4.1)              | 26.9 (2.0)            | 6.00 (0.06) | 4.17 (0.06) | 46.7 <sup>e</sup> (3.4) |
|                    | Peptone 10g/L – 120 mg/L alum  | 53.32 (0.48)            | 50.5 (1.0)            | 7.67 (0.04) | 7.26 (0.07) | 5.4 <sup>b</sup> (1.0)  |
|                    | Peptone 10 g/L – 360 mg/L alum | 53.32 (0.48)            | 9.53 (0.80)           | 7.67 (0.04) | 5.20 (0.02) | 82.1 <sup>c</sup> (1.3) |
|                    | Peptone 10g/L + NaCl 0.1 M     | 50.6 (3.1)              | 23.73 (0.51)          | 7.47 (0.02) | 7.25 (0.06) | 53.1 <sup>d</sup> (1.8) |
| <b>Non-aged PP</b> | FWW                            | 51.6 (3.8)              | 5.35 (0.89)           | 8.22 (0.07) | 7.34 (0.24) | 89.6 <sup>k</sup> (2.1) |
|                    | DW                             | 14.1 (1.6)              | -                     | 8.17 (0.10) | -           | -                       |
|                    | Peptone 10g/L – 120 mg/L alum  | 50.4 (1.2)              | 49.6 (1.4)            | 7.63 (0.01) | 7.22 (0.01) | 1.7 <sup>m</sup> (0.7)  |
|                    | Peptone 10 g/L – 360 mg/L alum | 50.4 (1.2)              | 17.2 (3.7)            | 7.63 (0.01) | 5.09 (0.06) | 66.3 <sup>n</sup> (6.4) |
|                    | Peptone 10g/L + NaCl 0.1 M     | 56.2 (1.1)              | 29.2 (5.1)            | 7.41 (0.01) | 7.08 (0.06) | 47.9 <sup>p</sup> (9.8) |
| <b>Aged PP</b>     | FWW                            | 56.2 (1.0)              | 8.0 (1.4)             | 8.05 (0.03) | 7.15 (0.06) | 85.9 <sup>k</sup> (2.2) |
|                    | DW                             | 55.9 (1.3)              | 37.4 (3.3)            | 6.05 (0.12) | 4.21 (0.01) | 33.3 <sup>r</sup> (5.8) |
|                    | Peptone 10g/L – 120 mg/L alum  | 52.36 (0.4)             | 50.8 (1.7)            | 7.58 (0.01) | 7.43 (0.05) | 3.1 <sup>m</sup> (3.9)  |
|                    | Peptone 10 g/L – 360 mg/L alum | 52.36 (0.4)             | 15.6 (2.6)            | 7.58 (0.01) | 5.40 (0.07) | 70.2 <sup>n</sup> (5.1) |
|                    | Peptone 10g/L + NaCl 0.1 M     | 54.58 (0.35)            | 26.26 (0.75)          | 7.30 (0.02) | 7.07 (0.01) | 51.9 <sup>p</sup> (1.6) |

Table SM1 – Mean (SD) turbidities, pH and removal efficiencies for the coagulation/flocculation tests.

Mean efficiencies with the same letter are not significantly different.
